# Supplementary material
Source: Royal Society of Chemistry journal article supplement (doi:10.1039/d6cp00510a)
Supplement: d6cp00510a1.pdf [file d6cp00510a1.pdf]

## Supporting information

### **Composition-Induced Solvent Effect Regulation toward Ultrafast and Selective Recovery of LCO Cathodes from Spent Lithium-Ion Batteries**

Xuemin Jing, Ziyi Sun, Xinyue Xu, Guangxian Liu, Yanhong Lu, Yu Chen\*

†Corresponding author: Yu Chen. *Department of Chemistry and Material Science, Langfang Normal University, Langfang 065000, Hebei, China.* Phone: +86-316-2188211; Fax: +86-316-2112462. Email: yuchen@iccas.ac.cn

**Table S1.** Compared experiment for pristine LCO and simulated LCO (LCO:PVDF:C:Al = 8:1:1:4) on the metal leaching efficiency, concentration and selectivity

| Factors       | $c_{Li}/\text{ppm}$ | $c_{Co}/\text{ppm}$ | $\eta_{Li}/\%$ | $\eta_{Co}/\%$ | $\eta_{Li/Co}$ |
|---------------|---------------------|---------------------|----------------|----------------|----------------|
| Pristine LCO  | 1420.1±24.6         | 796.5±31.7          | 83.9±1.2       | 5.5±0.1        | 15.3           |
| Simulated LCO | 988.1±21.5          | 3441.5±73.2         | 70.9±1.3       | 23.9±0.5       | 3.0            |

**Table S2.** The metal concentration, efficiency and selectivity for LCO, LFP and NCM LIBs cathodes in the CSER strategy

| Cathode                    | LCO         | LFP         | NCM         |
|----------------------------|-------------|-------------|-------------|
| $c_{\text{Li}}/\text{ppm}$ | 1641.5±43.1 | 769.1±10.2  | 566.1±40.1  |
| $c_{\text{Co}}/\text{ppm}$ | 501.1±153.8 |             | 820.3±18.0  |
| $c_{\text{Fe}}/\text{ppm}$ |             | 7779.8±50.6 |             |
| $c_{\text{Ni}}/\text{ppm}$ |             |             | 1877.6±72.2 |
| $c_{\text{Mn}}/\text{ppm}$ |             |             | 929.0±43.8  |
| $\eta_{\text{Li}}/\%$      | 98.3±1.1    | 78.7±1.0    | 42.5±3.0    |
| $\eta_{\text{Co}}/\%$      | 3.5±0.8     |             | 36.2±0.8    |
| $\eta_{\text{Fe}}/\%$      |             | 92.0±0.6    |             |
| $\eta_{\text{Ni}}/\%$      |             |             | 33.3±1.3    |
| $\eta_{\text{Mn}}/\%$      |             |             | 29.3±1.4    |
| $\eta_{\text{Li/Co}}$      | 28.2        |             | 1.2         |
| $\eta_{\text{Li/Fe}}$      |             | 0.85        |             |
| $\eta_{\text{Li/Ni}}$      |             |             | 1.3         |
| $\eta_{\text{Li/Mn}}$      |             |             | 1.5         |
